# Supplementary material for: Rational design of ethanol steam reforming catalyst based on analysis of Ni/La2O3 metal–support interactions
Source: Royal Society of Chemistry journal article supplement (doi:10.1039/c5cy00410a), 2015-12-10
Supplement: c5cy00410a1.pdf [file c5cy00410a1.pdf]

Supporting Information for

## Rational design of ethanol steam reforming catalyst based on analysis of Ni / La<sub>2</sub>O<sub>3</sub> metal-support interactions

Jyong-Yue Liu<sup>a</sup>, Wei-Nien Su<sup>b</sup>, John Rick<sup>a</sup>, Sheng-Chiang Yang<sup>a</sup>, Chun-Jern Pan<sup>a</sup>, Jyh-Fu Lee<sup>c</sup>, Jin-Ming Chen<sup>c</sup> and Bing-Joe Hwang<sup>a,c,\*</sup>

<sup>a</sup>*Department of Chemical Engineering, National Taiwan University of Science and Technology, Taipei 10617, Taiwan*

<sup>b</sup>*Graduate Institute of Applied Science and Technology, National Taiwan University of Science and Technology, Taipei 10617, Taiwan*

<sup>c</sup>*National Synchrotron Radiation Research Center, Hsinchu 300, Taiwan.*

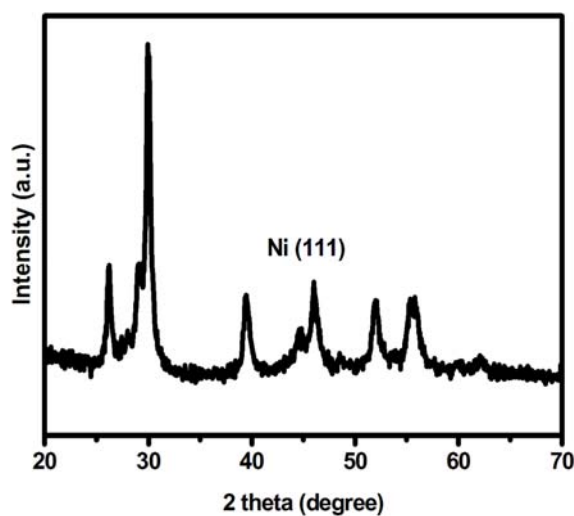

Figure S1 The XRD pattern of Ni/La<sub>2</sub>O<sub>3</sub> catalyst.

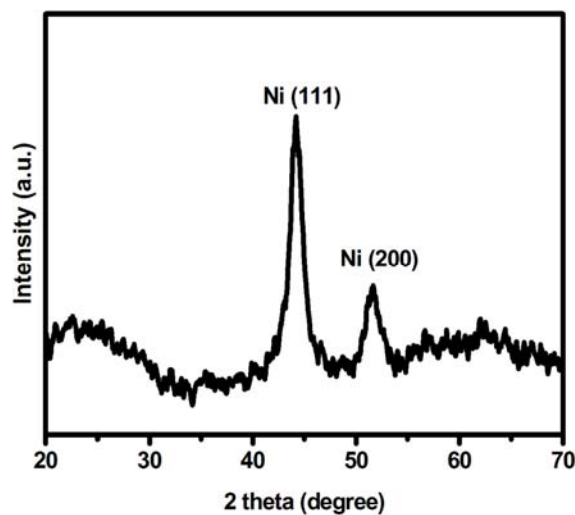

Figure S2 The XRD pattern of Ni/SiO<sub>2</sub> catalyst.

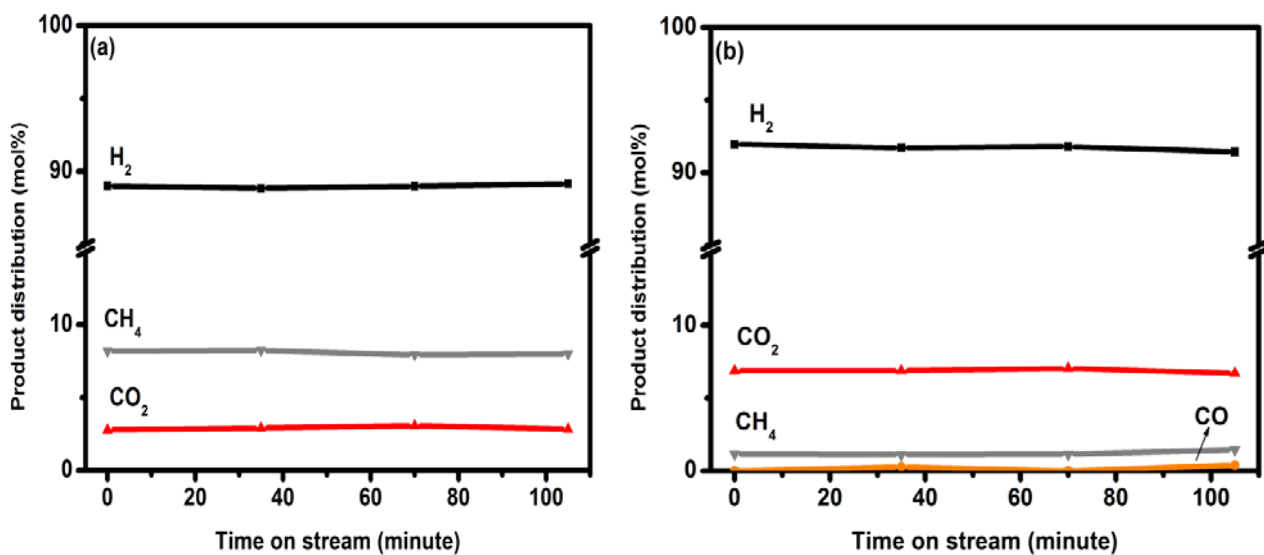

Figure S3 The reaction product distribution of : (a) Ni/SiO<sub>2</sub> and (b) Ni/La<sub>2</sub>O<sub>3</sub> catalysts as a function of reaction time at 395°C . Each catalyst was exposed to a well mixture of CO (29.5 torr), H<sub>2</sub> (295 torr) ,and H<sub>2</sub>O (334 torr).

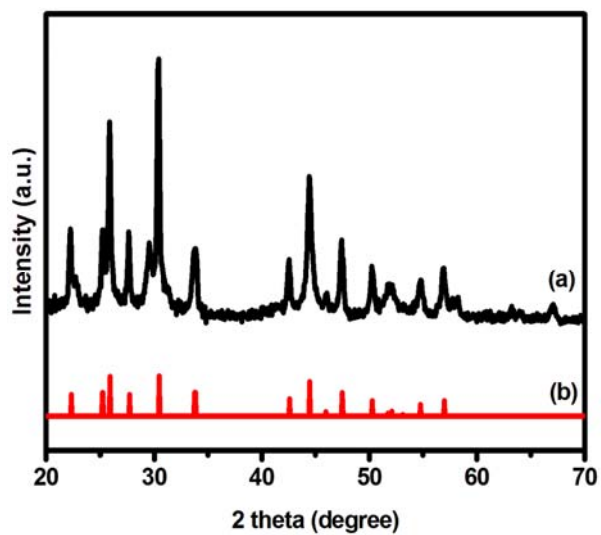

Figure S4 XRD patterns of (a) Ni/La<sub>2</sub>O<sub>3</sub> used catalyst and (b) La<sub>2</sub>O<sub>2</sub>CO<sub>3</sub> JCPDS reference.

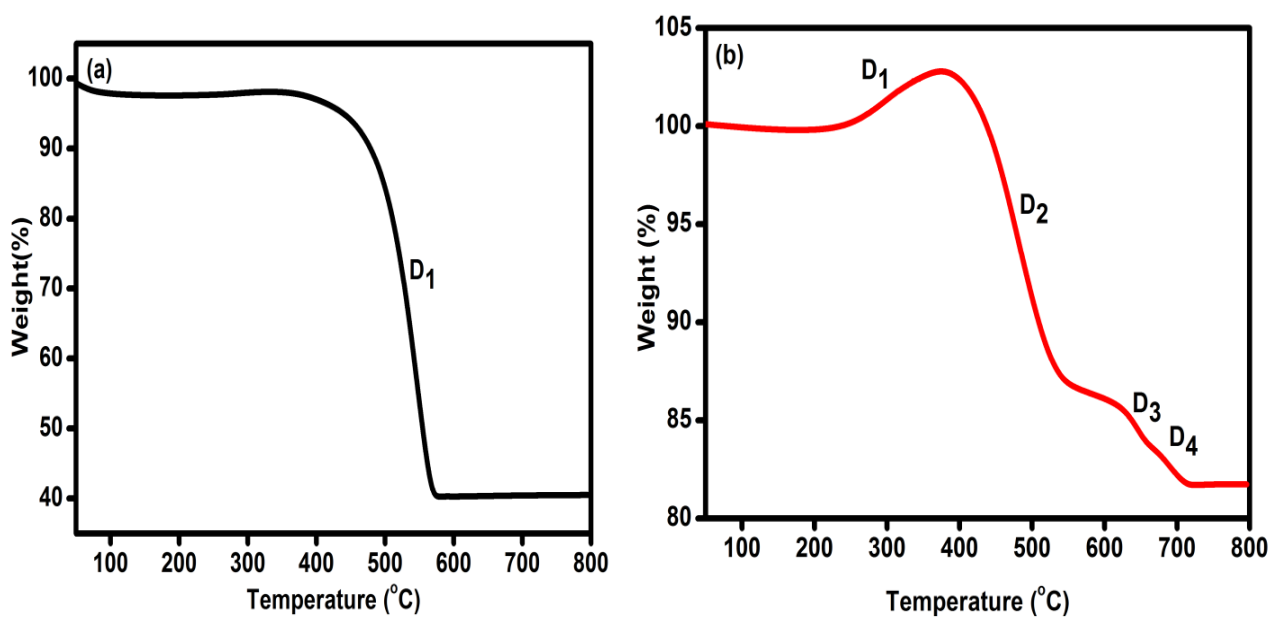

Figure S5 TGA of (a) Ni/SiO<sub>2</sub>, and (b) Ni/La<sub>2</sub>O<sub>3</sub> used catalysts.

Table S1 the H<sub>2</sub> uptake and grain size of various catalysts

| Catalyst                          | H <sub>2</sub> uptake <sup>1</sup><br>$\mu$ mole/g | Grain size <sup>2</sup><br>(nm) |
|-----------------------------------|----------------------------------------------------|---------------------------------|
| 30°C                              |                                                    |                                 |
| Ni/SiO <sub>2</sub>               | 552.8                                              | 6.3                             |
| Ni/La <sub>2</sub> O <sub>3</sub> | 54.4                                               | 6.6                             |

<sup>1</sup>: Calculated based on the H<sub>2</sub> pulse experiment.

<sup>2</sup>: Calculated based on the XRD results

Table S2 Carbon balance for the Ni/La<sub>2</sub>O<sub>3</sub> catalyst with various reaction temperatures

| Temp (°C)                                  | 300  | 325  | 360  | 395  | 435  | 465  | 500  |
|--------------------------------------------|------|------|------|------|------|------|------|
| Input C balance<br>(10 <sup>-7</sup> mol)  | 2.49 | 2.49 | 2.49 | 2.49 | 2.49 | 2.49 | 2.49 |
| Output C balance<br>(10 <sup>-7</sup> mol) | 2.49 | 2.49 | 2.41 | 2.45 | 2.30 | 2.25 | 2.36 |

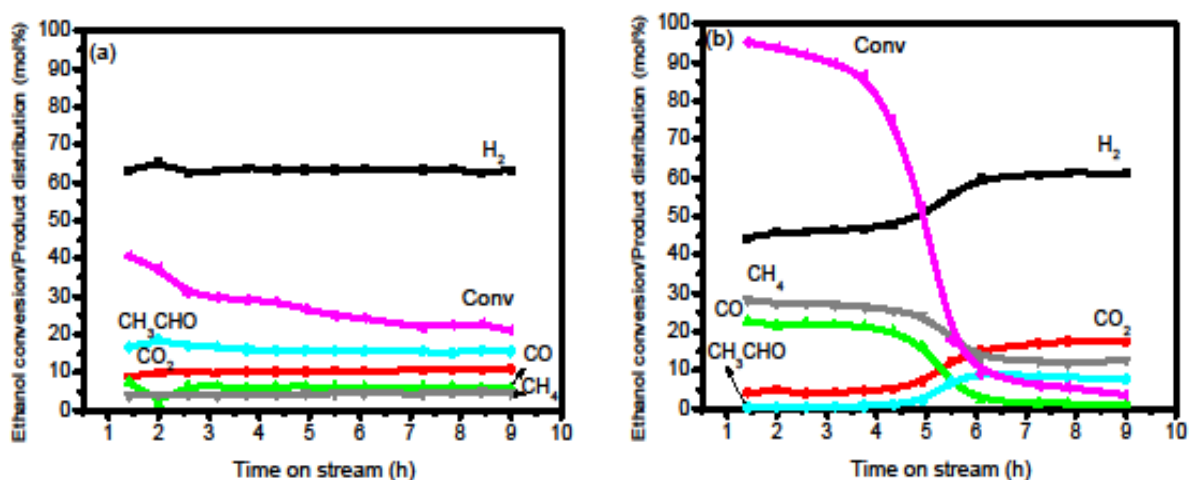

Figure S6 ESR reaction of (a) Ni/La<sub>2</sub>O<sub>3</sub> and (b) Ni/SiO<sub>2</sub> catalysts with time on stream (h). Reaction temperature: 395°C. Condition: WHSV = 44.8 h<sup>-1</sup> and H<sub>2</sub>O/EtOH = 4
